# Supplementary material for: Inhibition of primary breast tumor growth and metastasis using a neuropilin-1 transmembrane domain interfering peptide
Source: PubMed Central journal article supplement (PMC5342376; doi:10.18632/oncotarget.10101), 2016-06-16
Supplement: oncotarget-07-54723-s001.pdf [file oncotarget-07-54723-s001.pdf]

## Inhibition of primary breast tumor growth and metastasis using a neuropilin-1 transmembrane domain interfering peptide

### SUPPLEMENTARY FIGURES AND TABLES

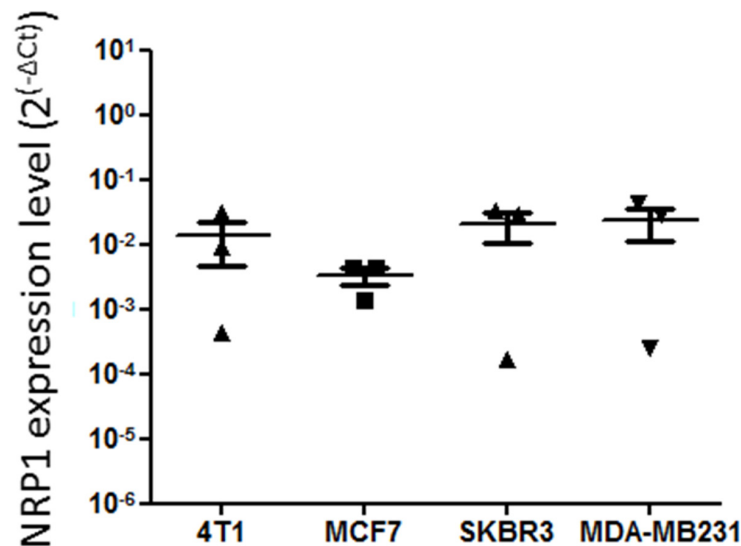

**Supplementary Figure S1: expression of NRP1 in the different cell lines.** The expression level of NRP1 was determined in 4T1, MCF7, SKBR3 and MDA-MB231 cells using specific primers and RT-QPCR analysis (Applied 7500HT, Sybergreen mix with human h-NRP1\_F CCGGAGAGAGCCACTCATG, h-NRP1\_R GTCATCACATTCATCCACCAA and mouse mNRP1\_F GAGGAATGTTCTGTCGCTATGA, mNRP1\_R CCAATGTGAGGGCCAACCT primers). The results are presented for three different RNA extracts for each cell lines compared to housekeeping gene GAPDH ( $2^{-\Delta Ct}$ ). This analysis revealed similar levels of NRP1 expression in all cell lines consistently with the results obtained at the protein level (see figure 1).

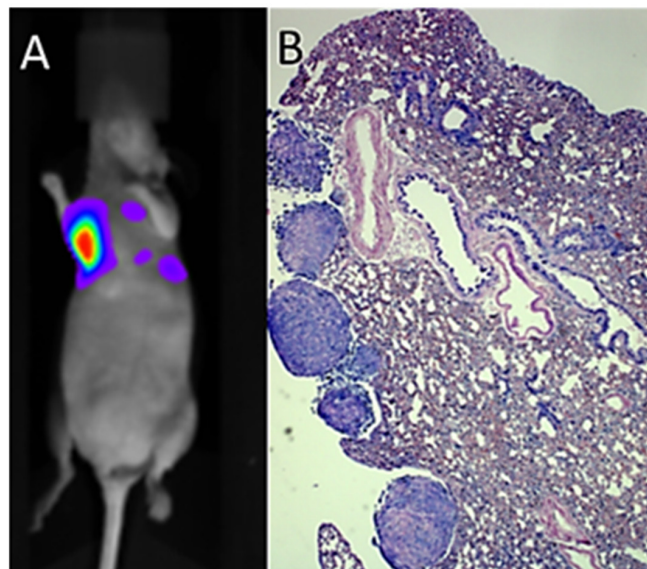

**Supplementary Figure S2: histological validation of bioluminescence signals.** Quality control experiments were conducted to validate the anatomical concordance of bioluminescent signals and presence of detectable metastases at the histological level. **A.** Image of mouse presenting bioluminescent spots including a large one in the lung. **B.** Histological section (cresyl violet staining) confirming the presence a large multifocal metastasis in the lung.

**Supplementary Table S1: Toxicology analysis (blood biochemistry).** LDH: Lactate dehydrogenase; ASAT: aspartate transaminase; ALAT alanine transaminase; ALP alkaline phosphatase; creat: creatinine. ns: not significant, \*\* p < 0.01 using mann whitney test.

| ANOVA/Bonferroni's Test          | Mean Diff. | T       | P < 0.05 | Summary |
|----------------------------------|------------|---------|----------|---------|
| LDH cont vs LDH NRP1             | 261,7      | 3,308   | Yes      | **      |
| ASAT cont vs ASAT NRP1           | 140,5      | 2,649   | No       | ns      |
| ALAT cont vs ALAT NRP1           | -5,859     | 0,1105  | No       | ns      |
| ALP cont vs ALP NRP1             | 2,222      | 0,03997 | No       | ns      |
| Creat cont vs Creat NRP1         | -0,8238    | 0,01611 | No       | ns      |
| Albumin cont vs Albumin NRP1     | 1,368      | 0,02674 | No       | ns      |
| Bilirubin cont vs Bilirubin NRP1 | -0,7233    | 0,01188 | No       | ns      |

Biochemistry analysis of blood samples of mice treated with vehicle (con) or MTP-NRP1 (NRP1). LDH: Lactate dehydrogenase; ASAT: aspartate transaminase; ALAT alanine transaminase; ALP alkaline phosphatase; Creat: creatinine.

**Supplementary Table S2: Toxicology analysis (blood cells numeration).** HGB: haemoglobin; HCT: hematocrite; PLT: platelets; baso: basophil; Eosino: eosinophil; Mono: monocyte; lympho: lymphocyte. ns: not significant, \* p < 0.05, mann whitney test.

| ANOVA/Bonferroni's Test                  | Mean Diff. | T        | P < 0.05 | Summary |
|------------------------------------------|------------|----------|----------|---------|
| HGB cont vs HGB NRP1                     | -0,6       | 0,03819  | No       | ns      |
| Mean Corpuscular Vol cont vs MCV NRP1    | 3,5        | 0,2228   | No       | ns      |
| HCT cont vs HCT NRP1                     | -2,18      | 0,1387   | No       | ns      |
| Plt cont vs Plt NRP1                     | -51,8      | 3,297    | Yes      | *       |
| % Baso cont vs % Baso NRP1               | 0,11       | 0,007001 | No       | ns      |
| % Large Cells cont vs % Large cells NRP1 | -0,66      | 0,042    | No       | ns      |
| % Eosino cont vs % Eosino NRP1           | 1,63       | 0,1037   | No       | ns      |
| % Mono cont vs % Mono NRP1               | 1,31       | 0,08337  | No       | ns      |
| % Lympho cont vs % Lympho NRP1           | -31,37     | 1,997    | No       | ns      |

Numeration analysis of blood samples of mice treated with vehicle (cont) or MTP-NRP1 (NRP1). HGB: haemoglobin; HCT: hematocrite; PLT: platelets; Baso: basophil; Eosino: eosinophil; Mono: monocyte; lympho: lymphocyte.
